# Supplementary material
Source: publisher site journal article supplement (https://www.spandidos-publications.com/1745/downloadSupplementary)

Figure S1. Inhibition ratio of K562/ADM cells treated with various concentrations of ADM for 12, 24 and 48 h detected by MTT assay; n=3. ADM, adriamycin; MTT, 3-(4,5-dimethylthiazol-2-yl)-2,5-diphenyltetrazolium bromide.

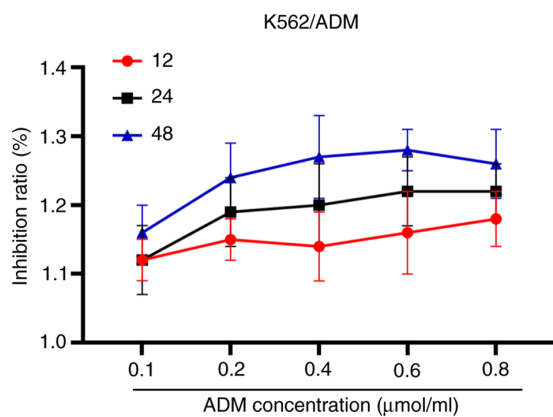

Supplement: Supplementary file 1 [file downloadSupplementary]
